# Supplementary material for: Using the taxon-specific genes for the taxonomic classification of bacterial genomes
Source: PubMed Central journal article supplement (PMC4438512; doi:10.1186/s12864-015-1542-0), 2015-05-20

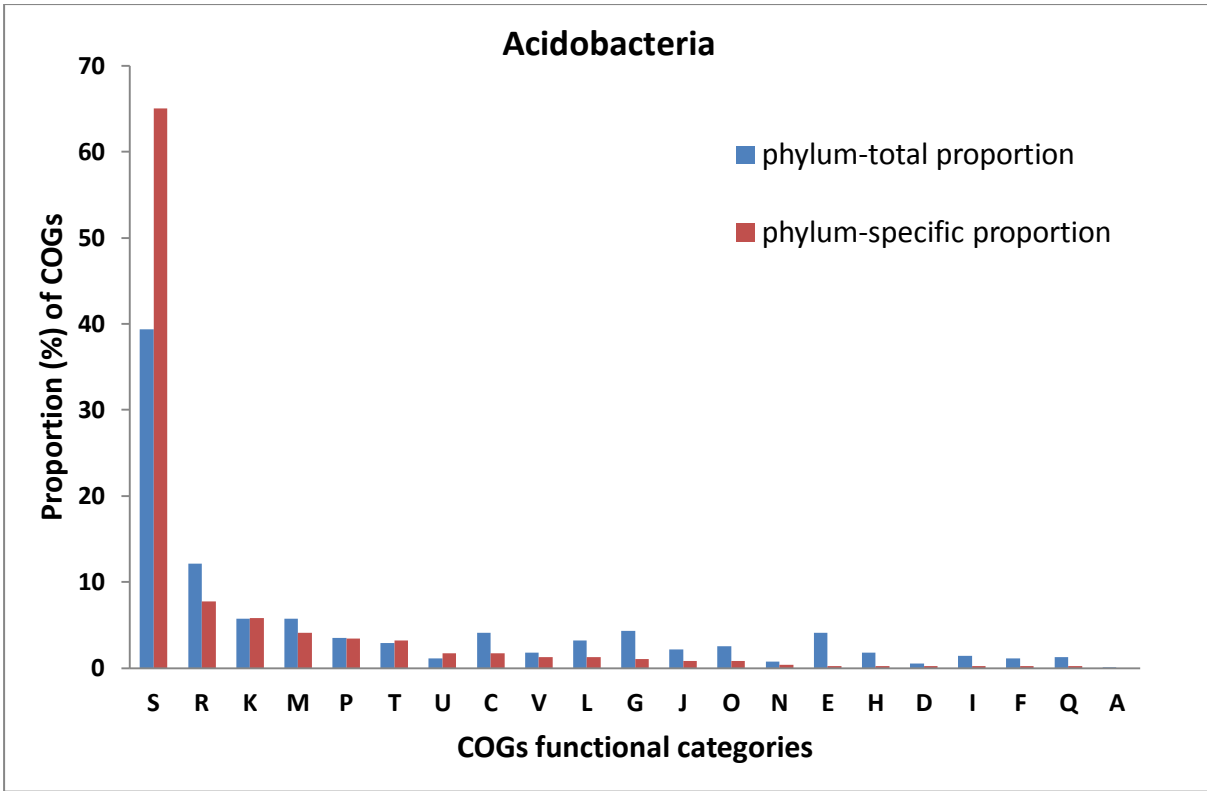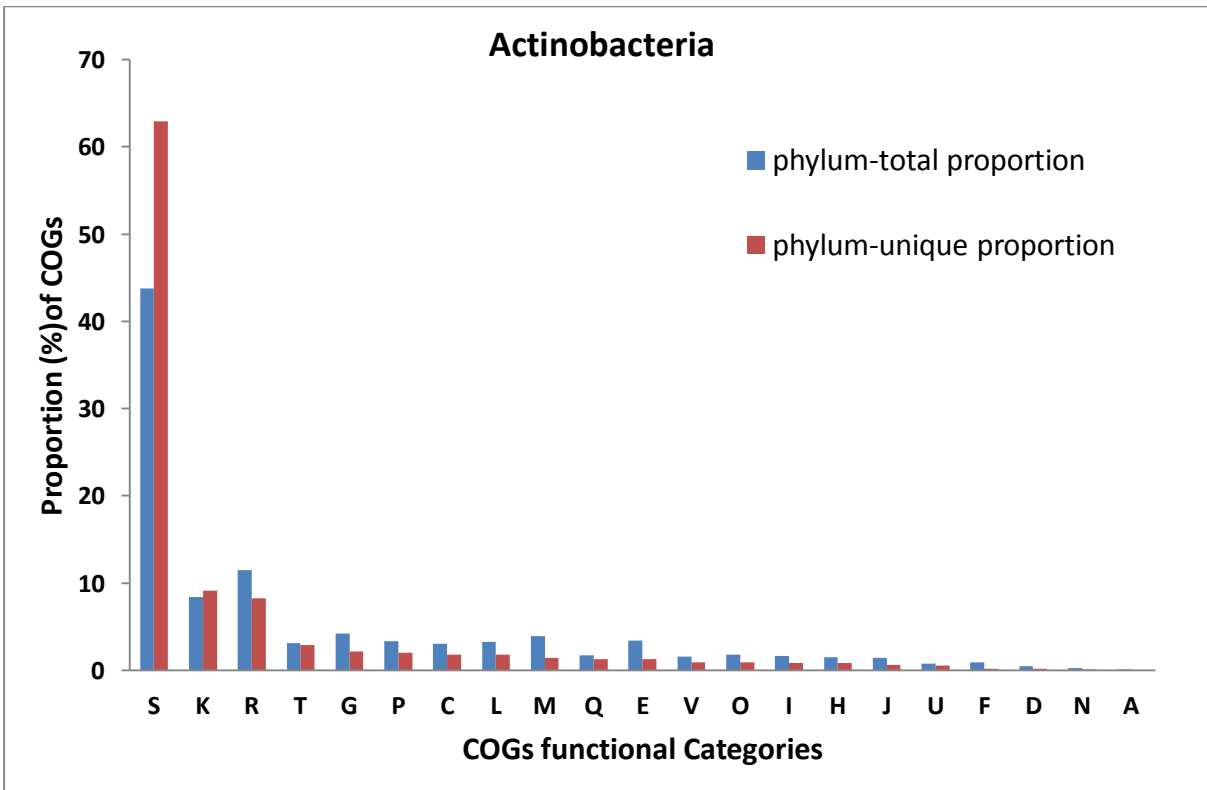

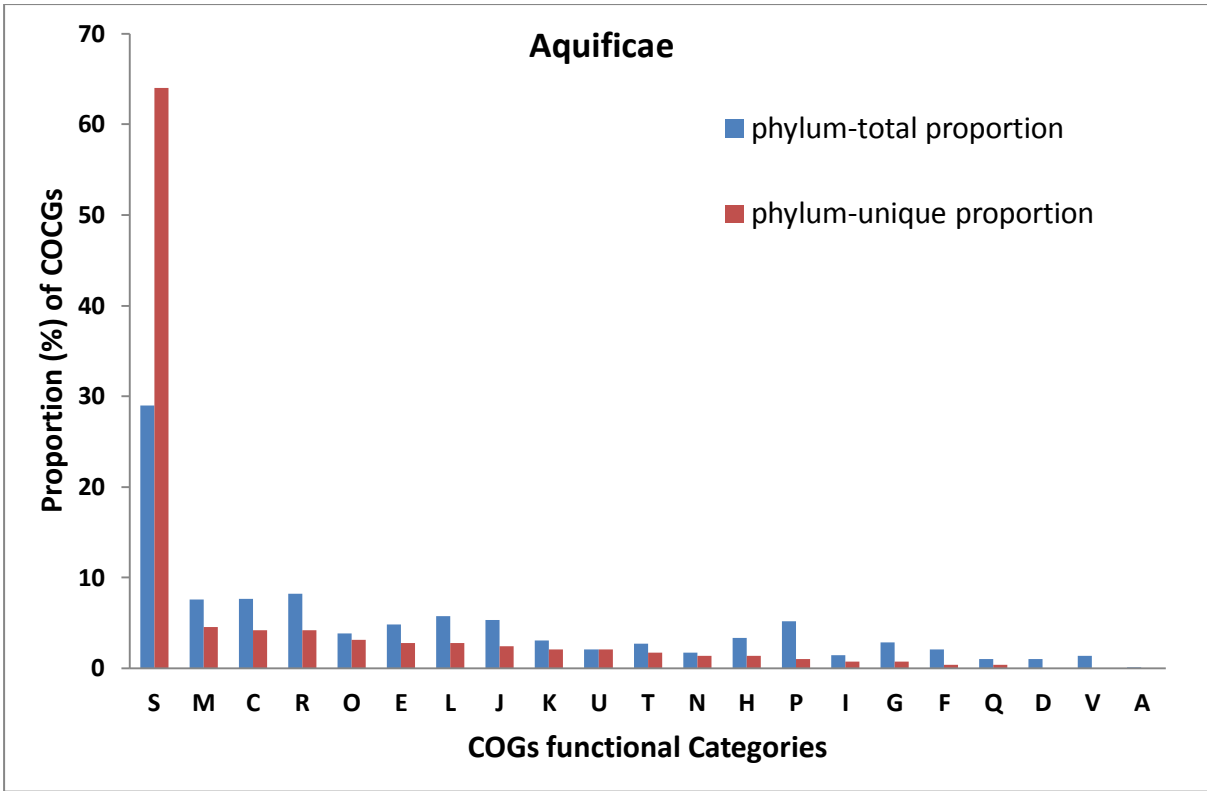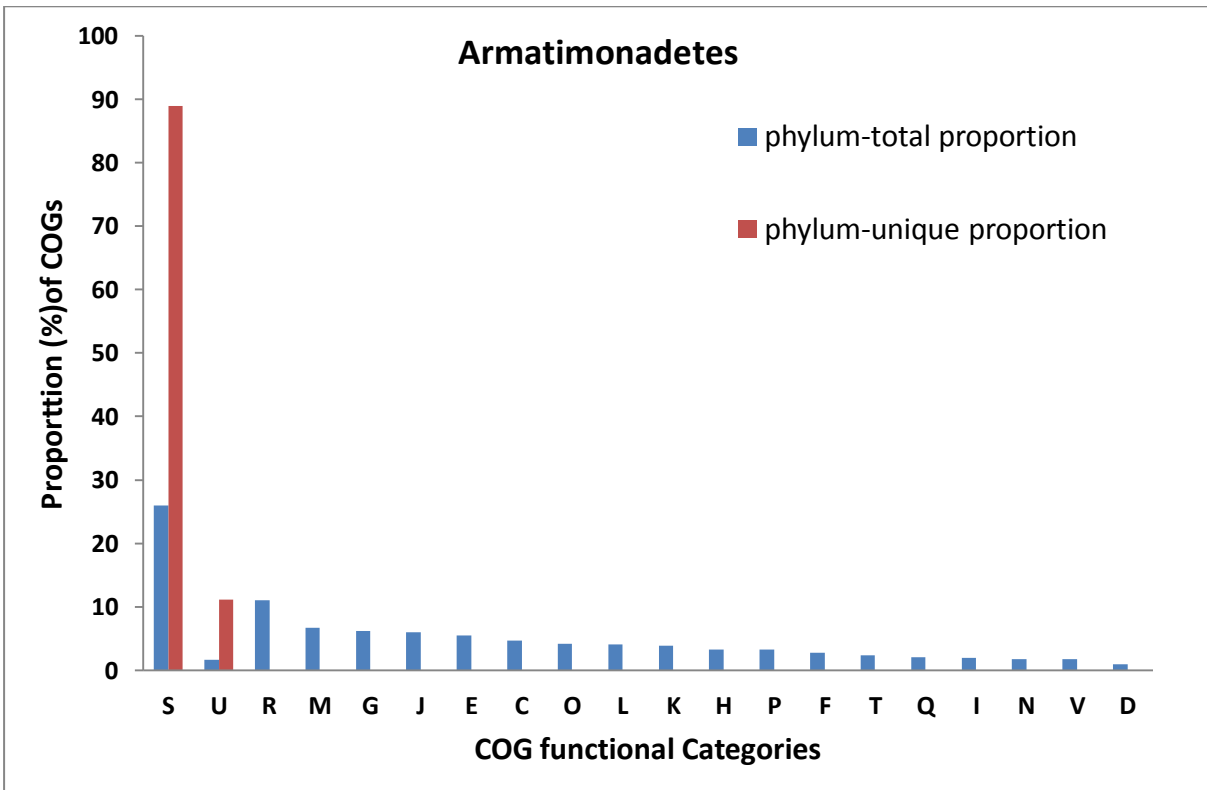

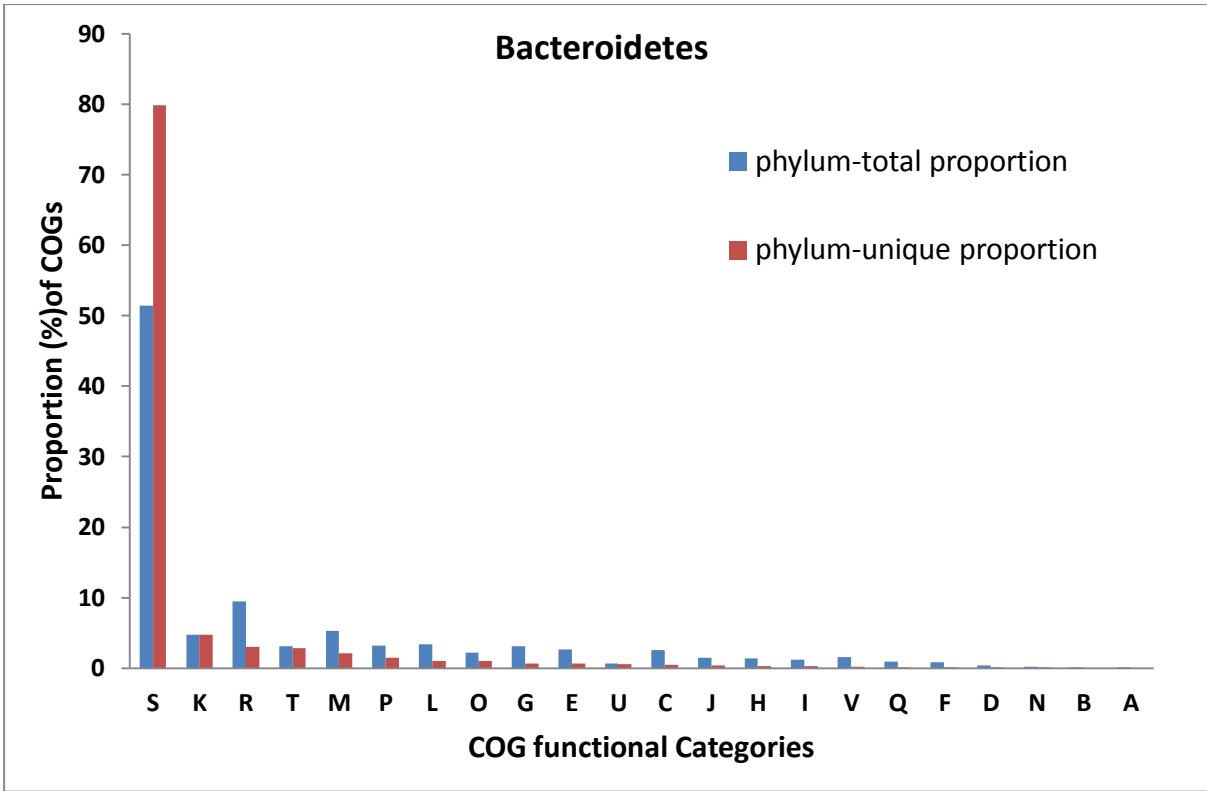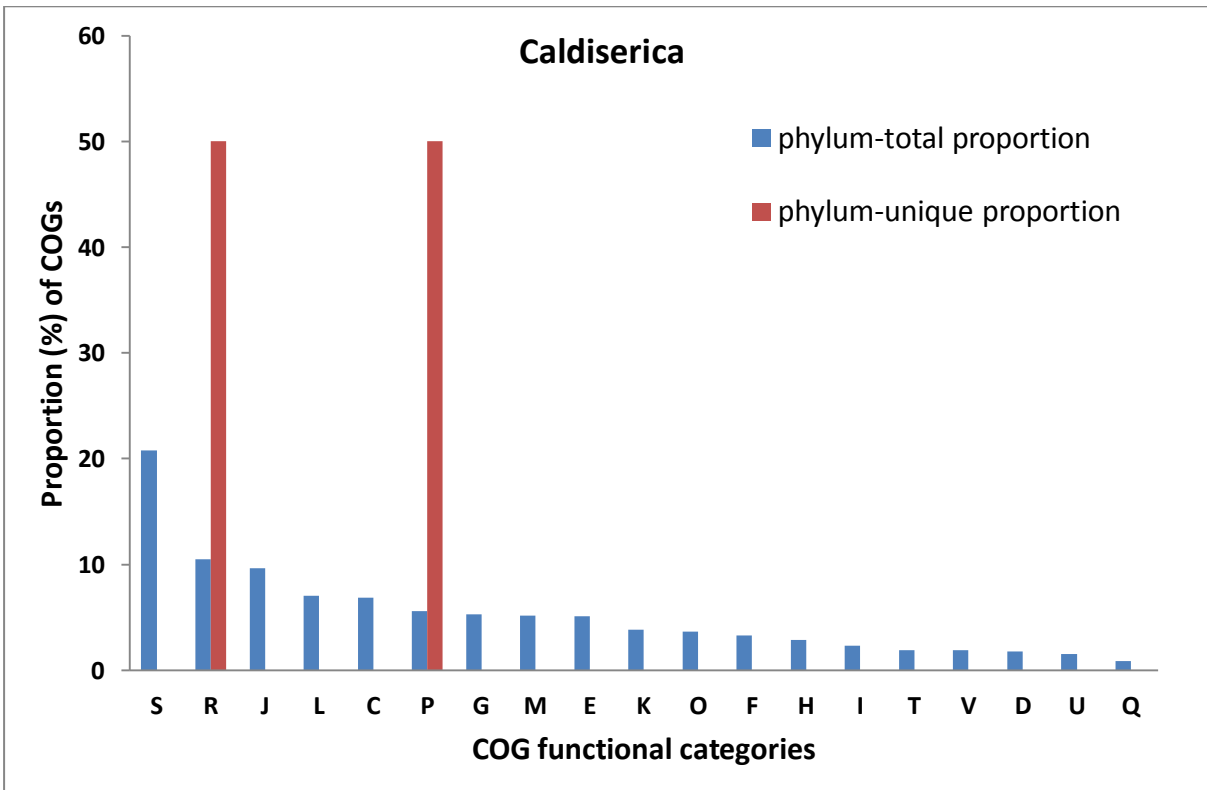

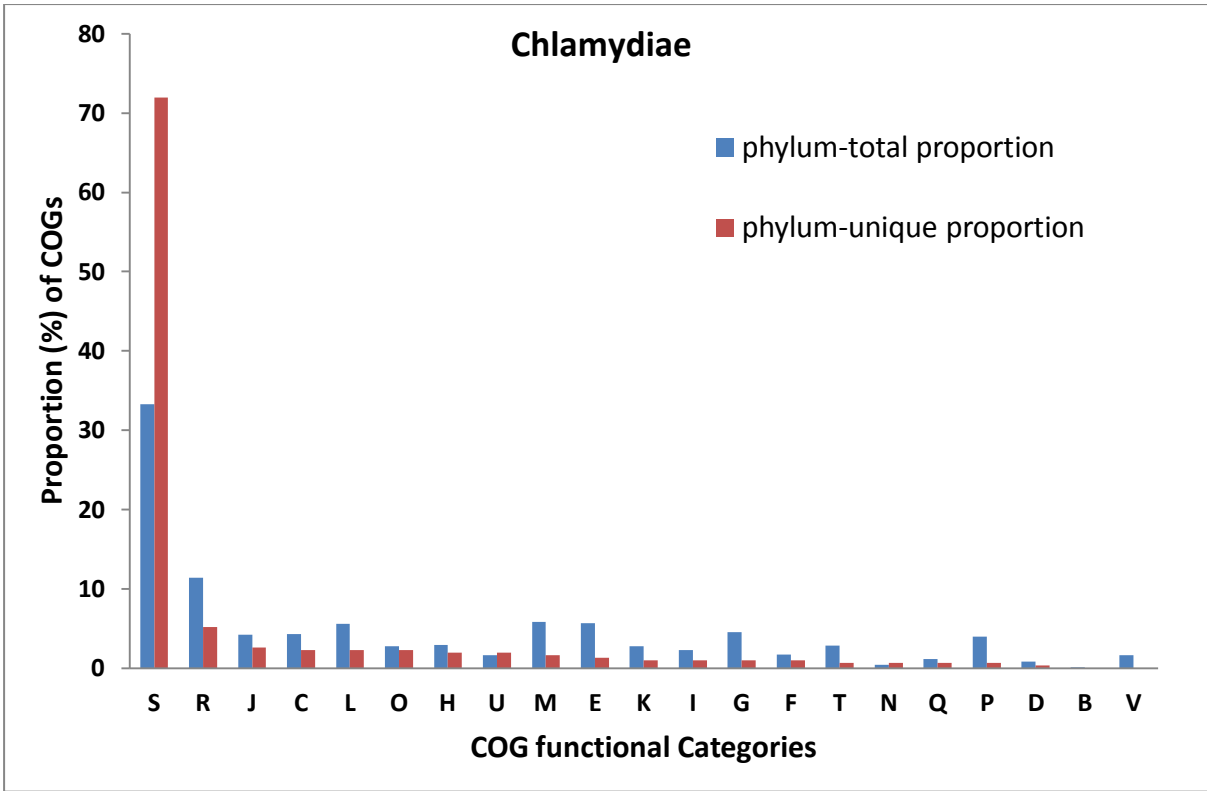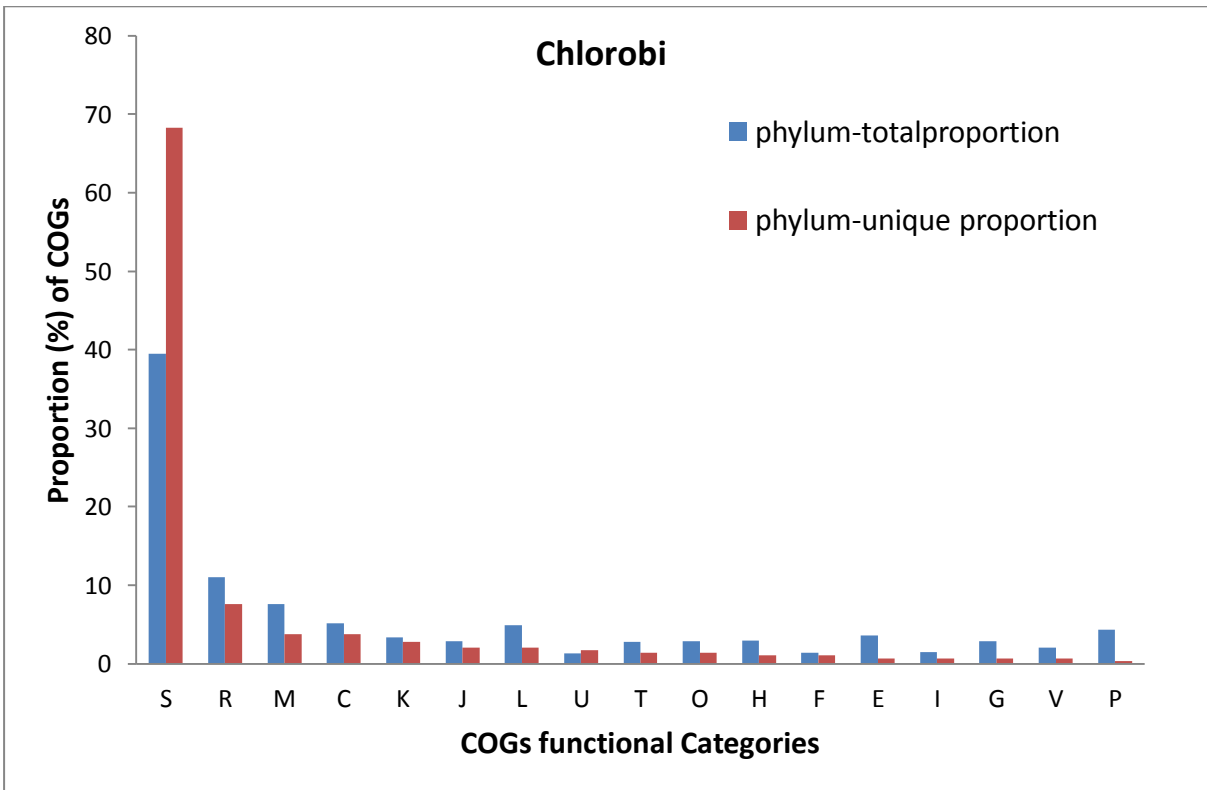

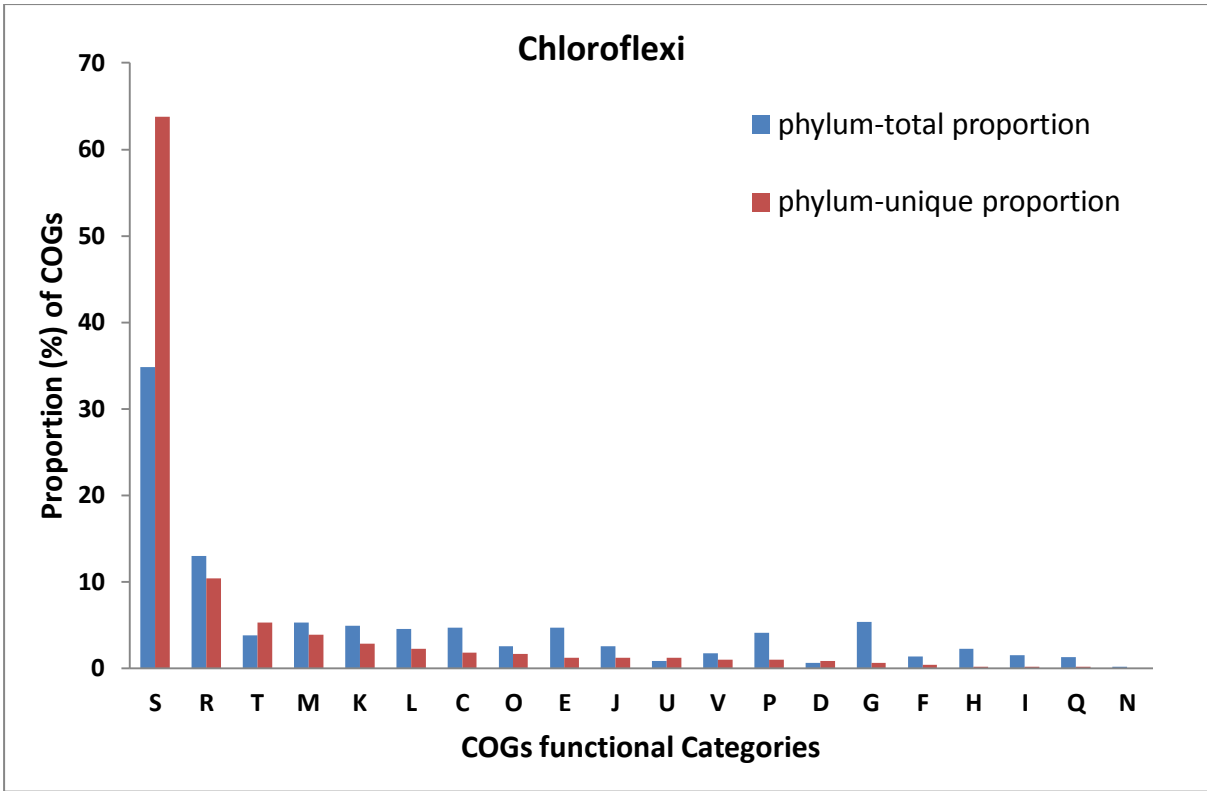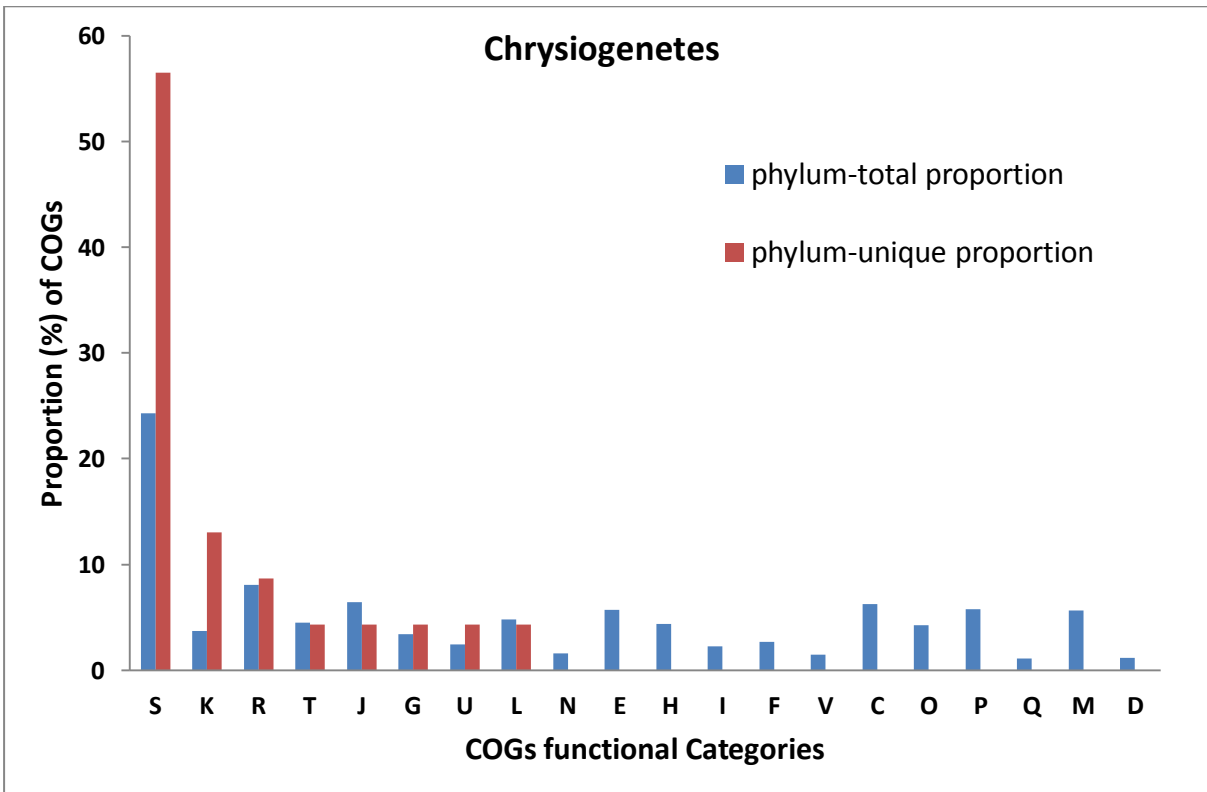

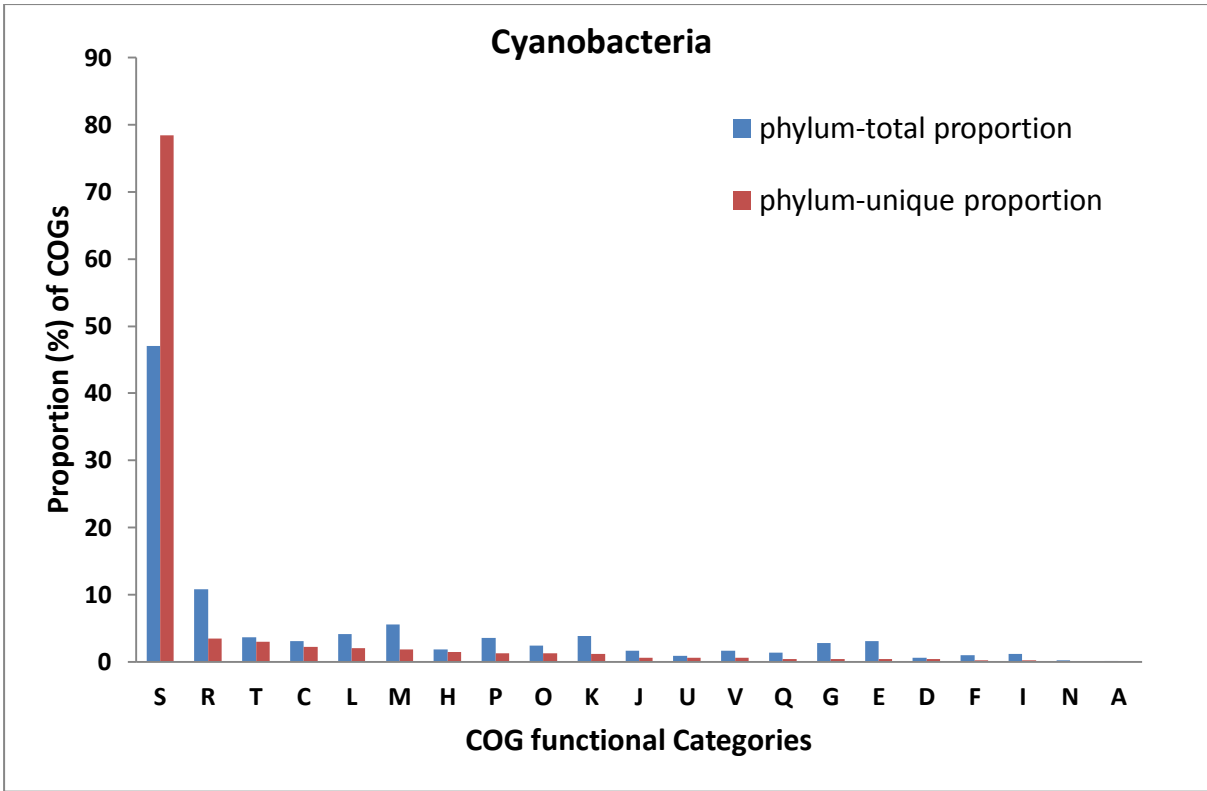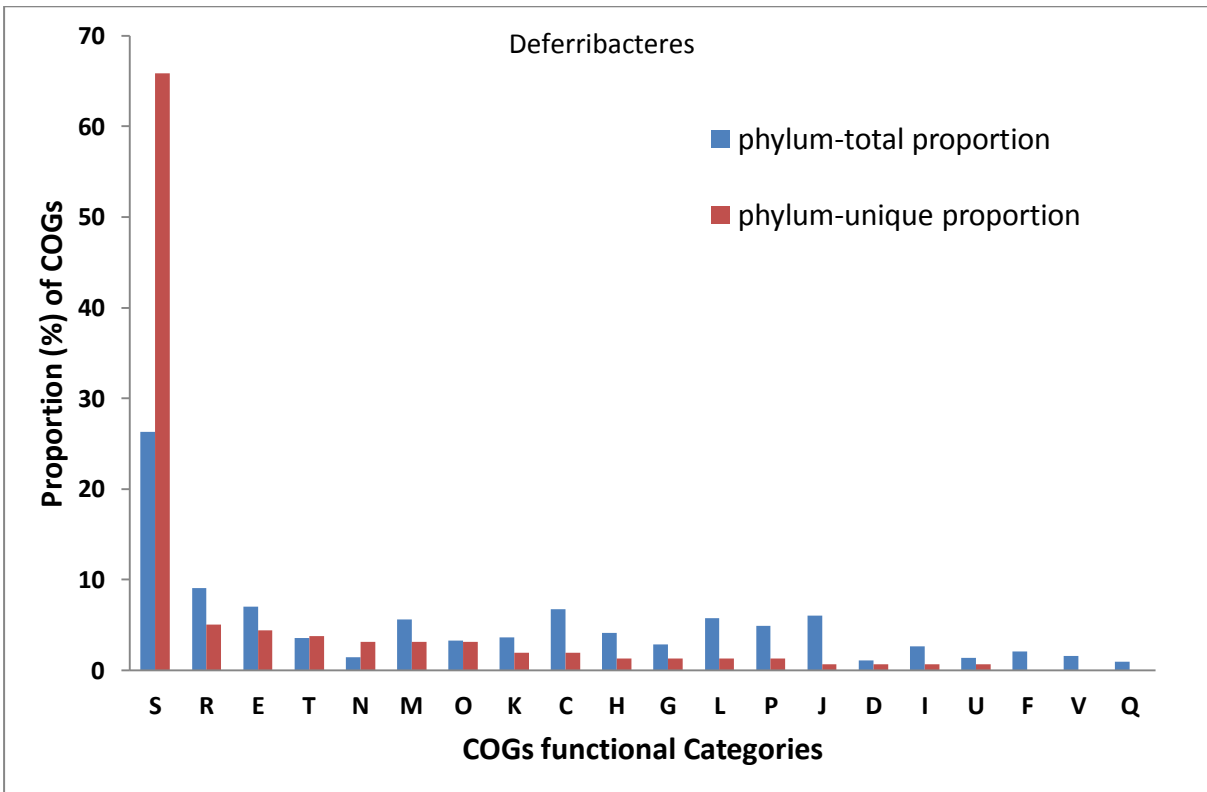

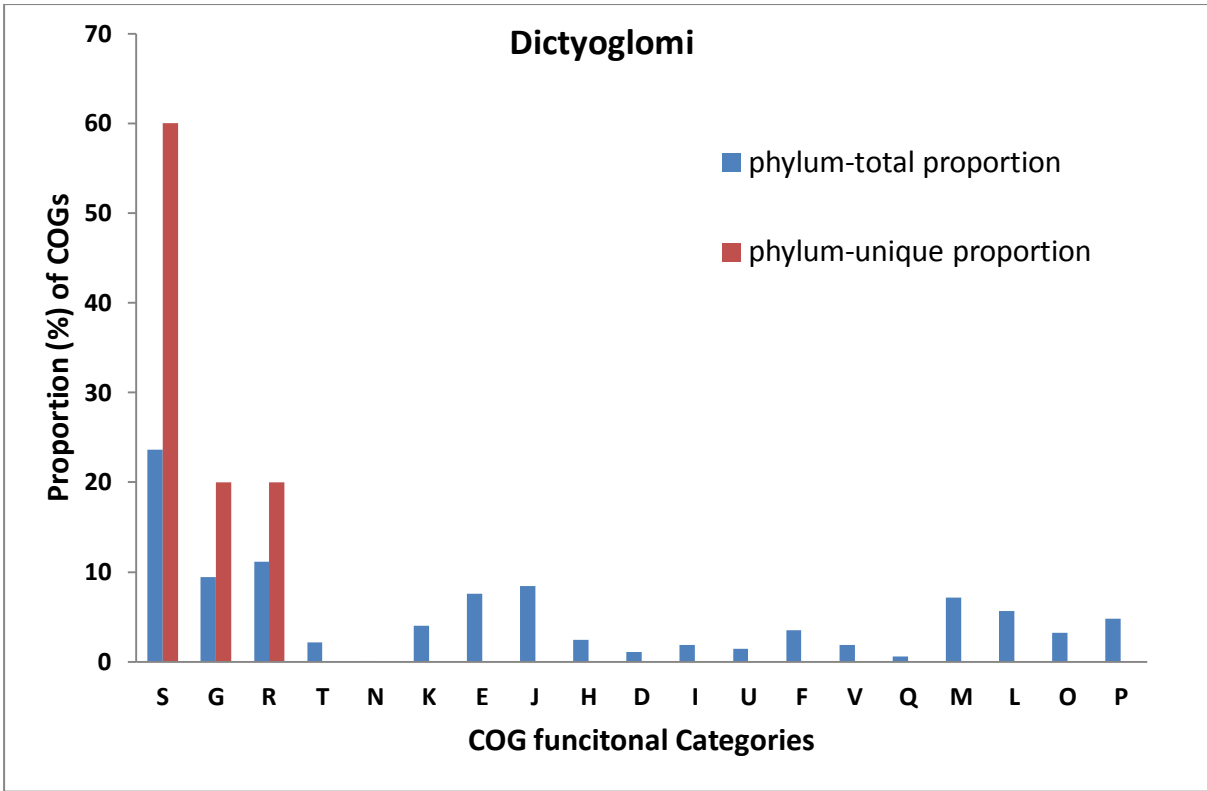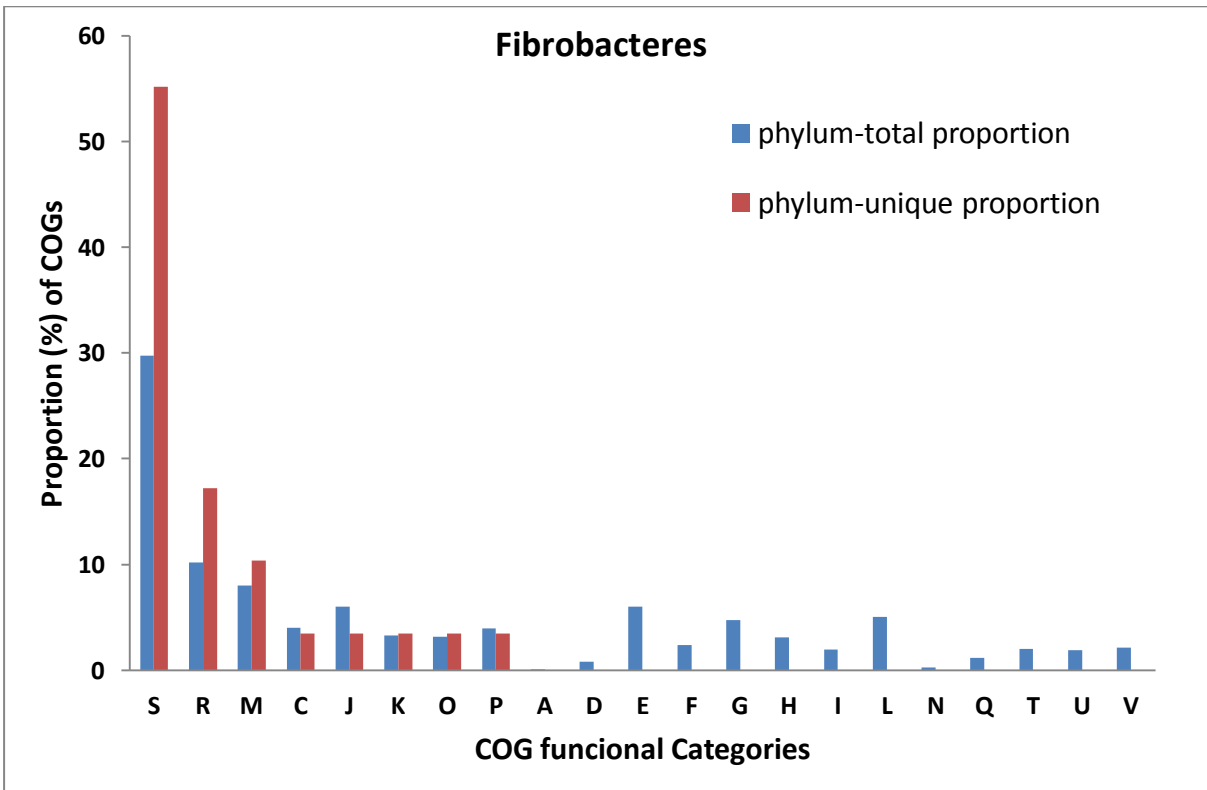

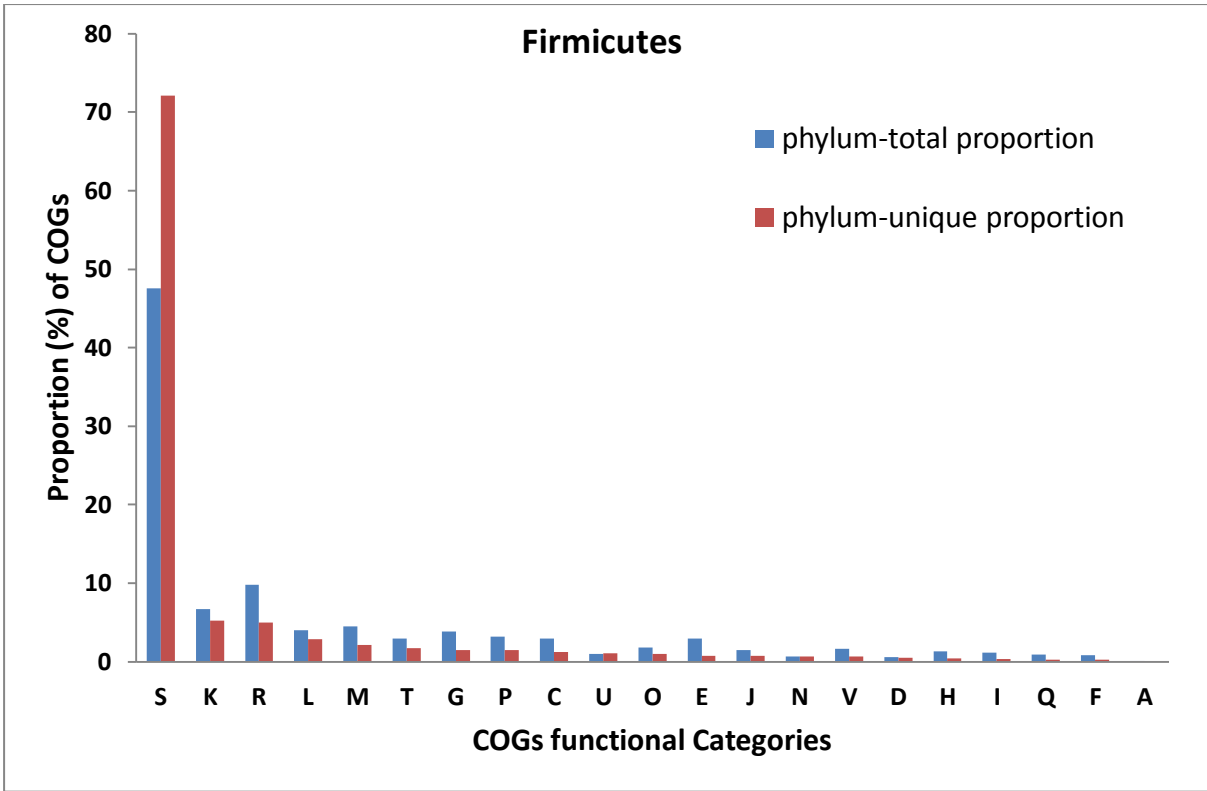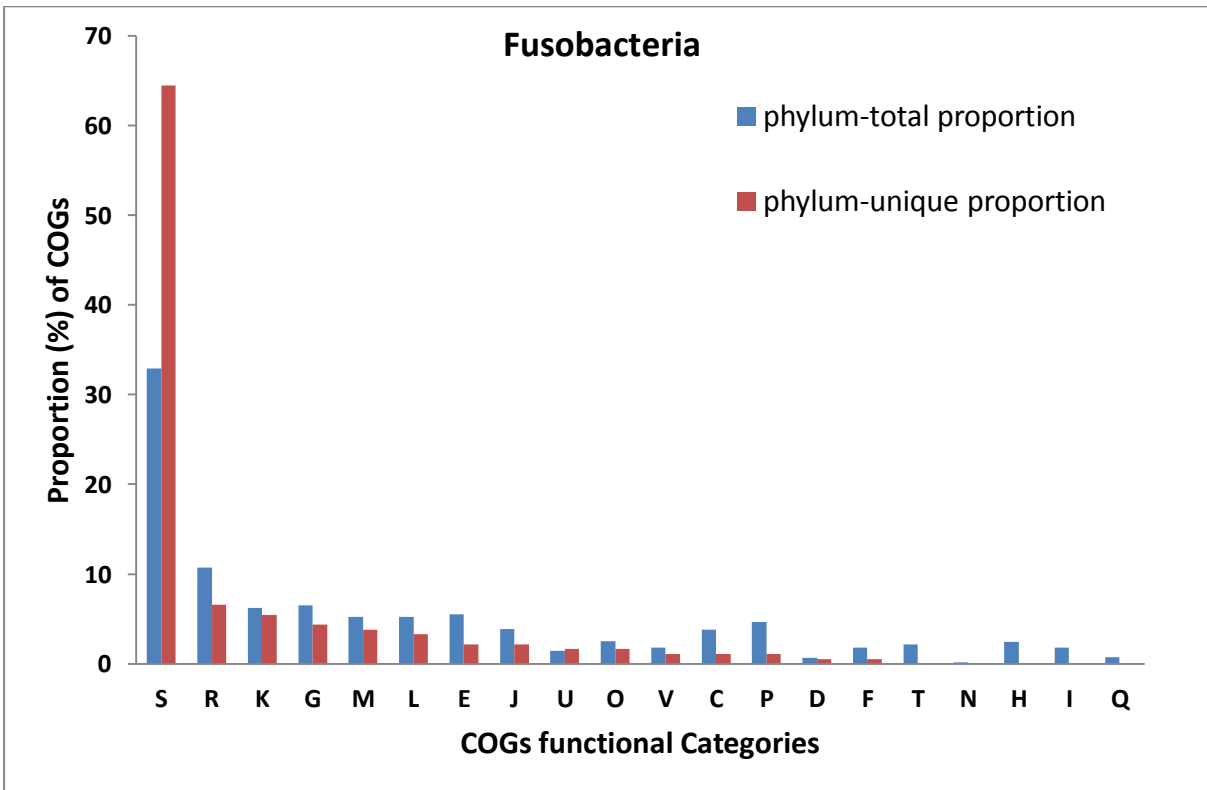



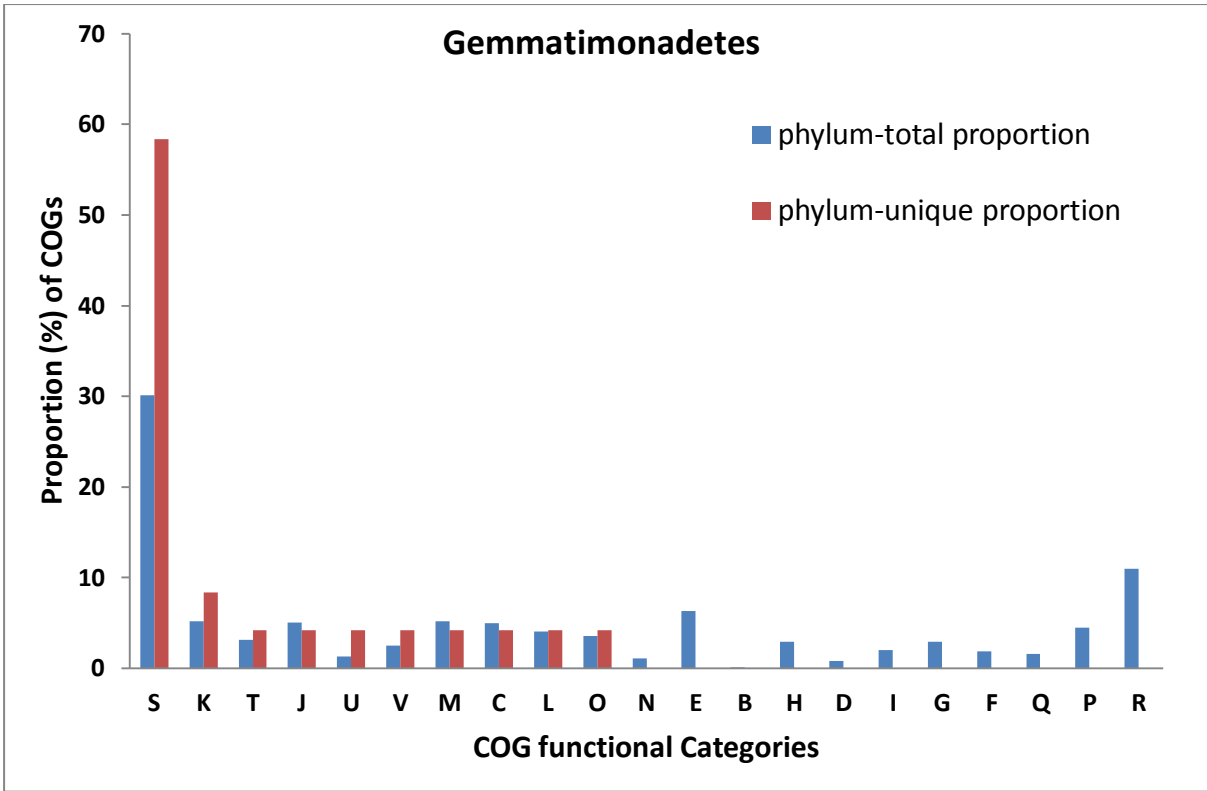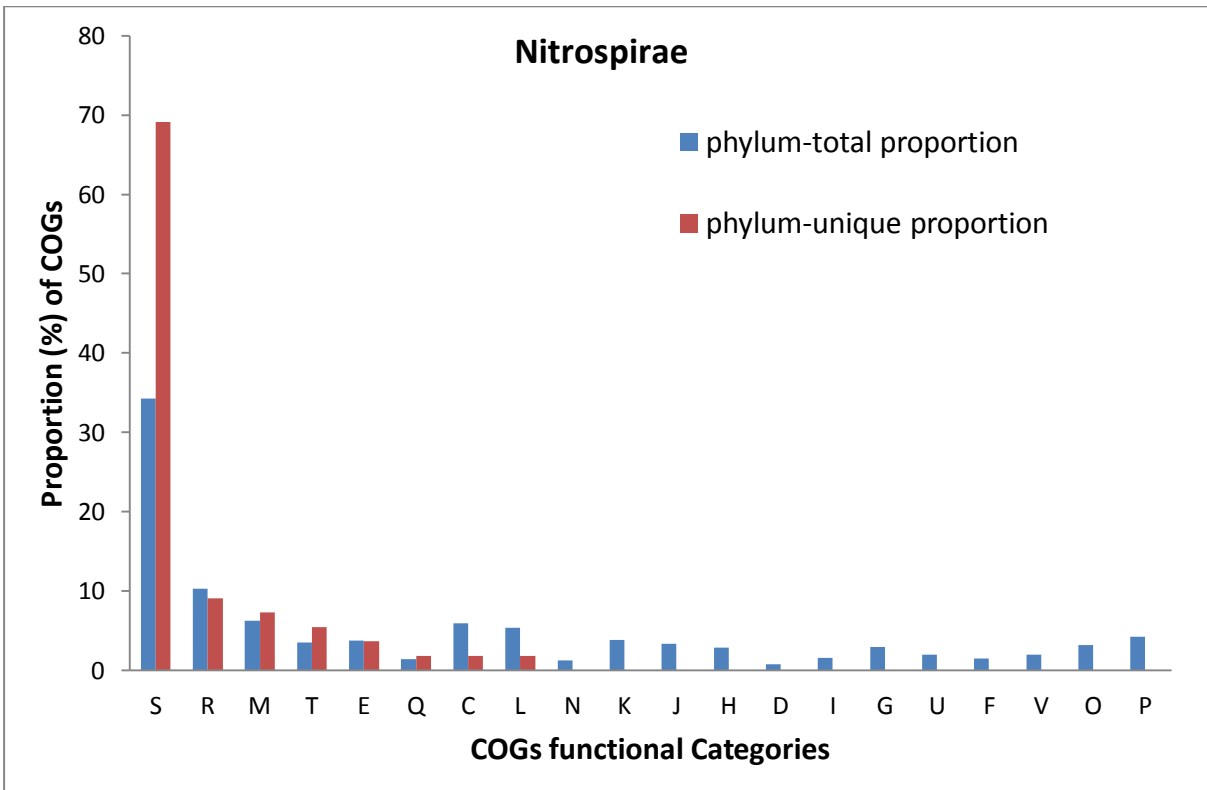

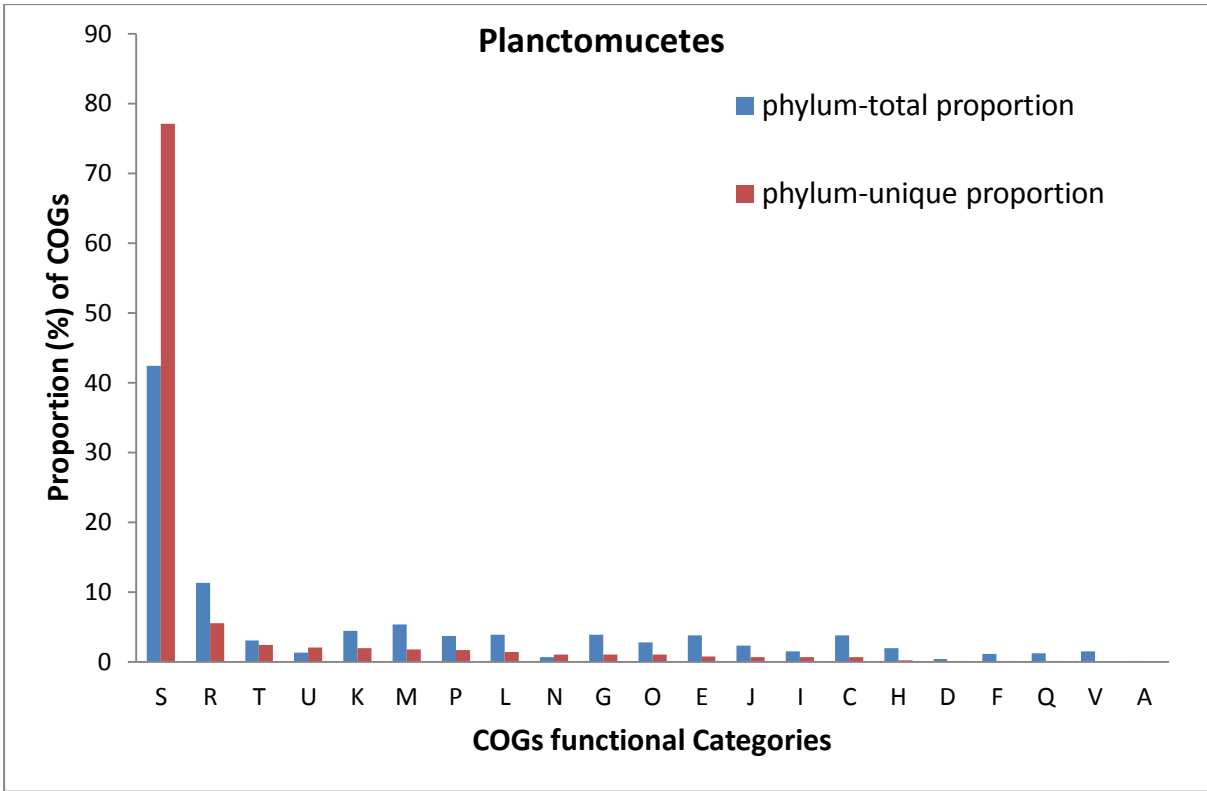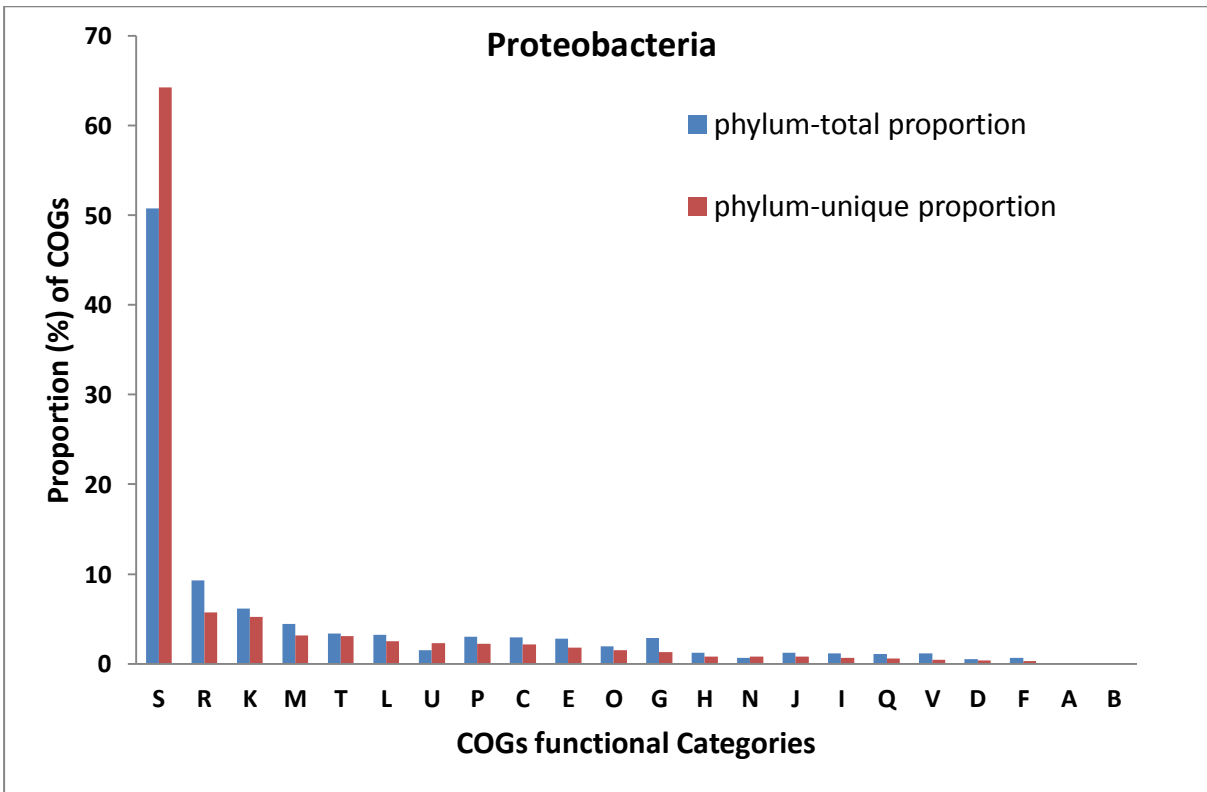

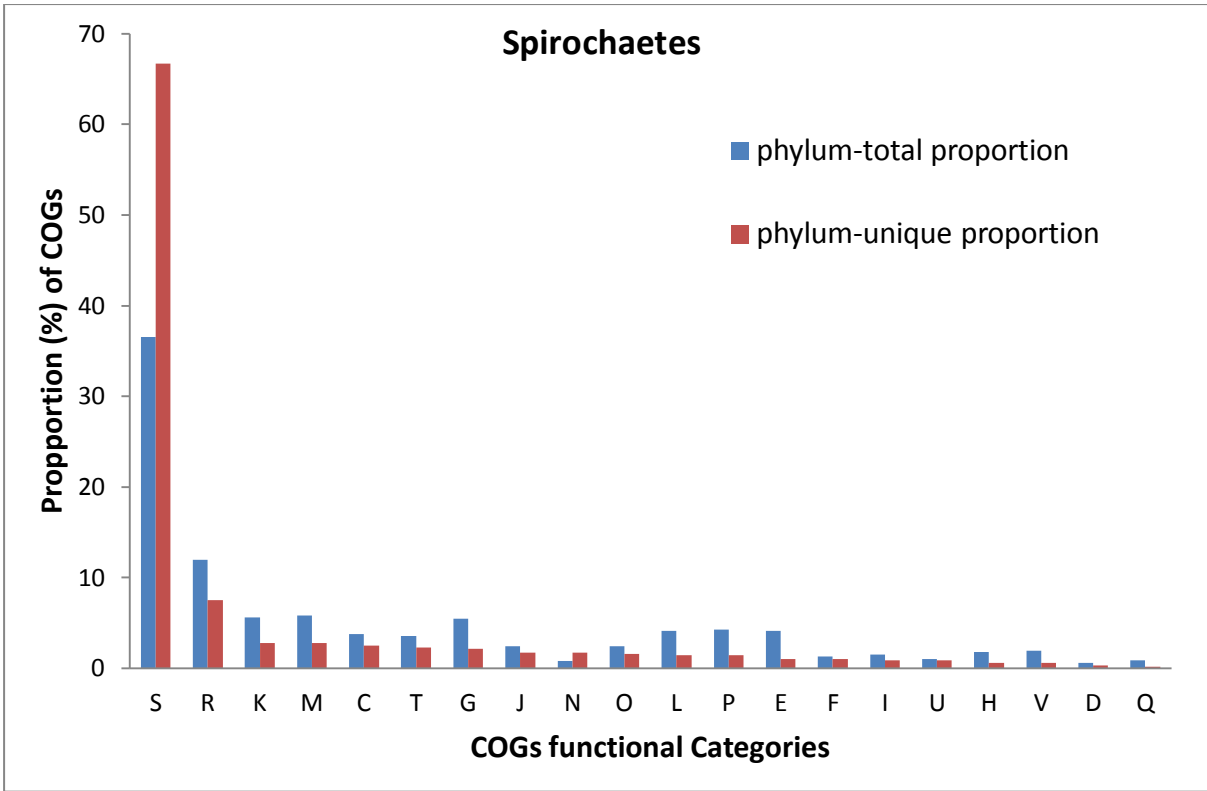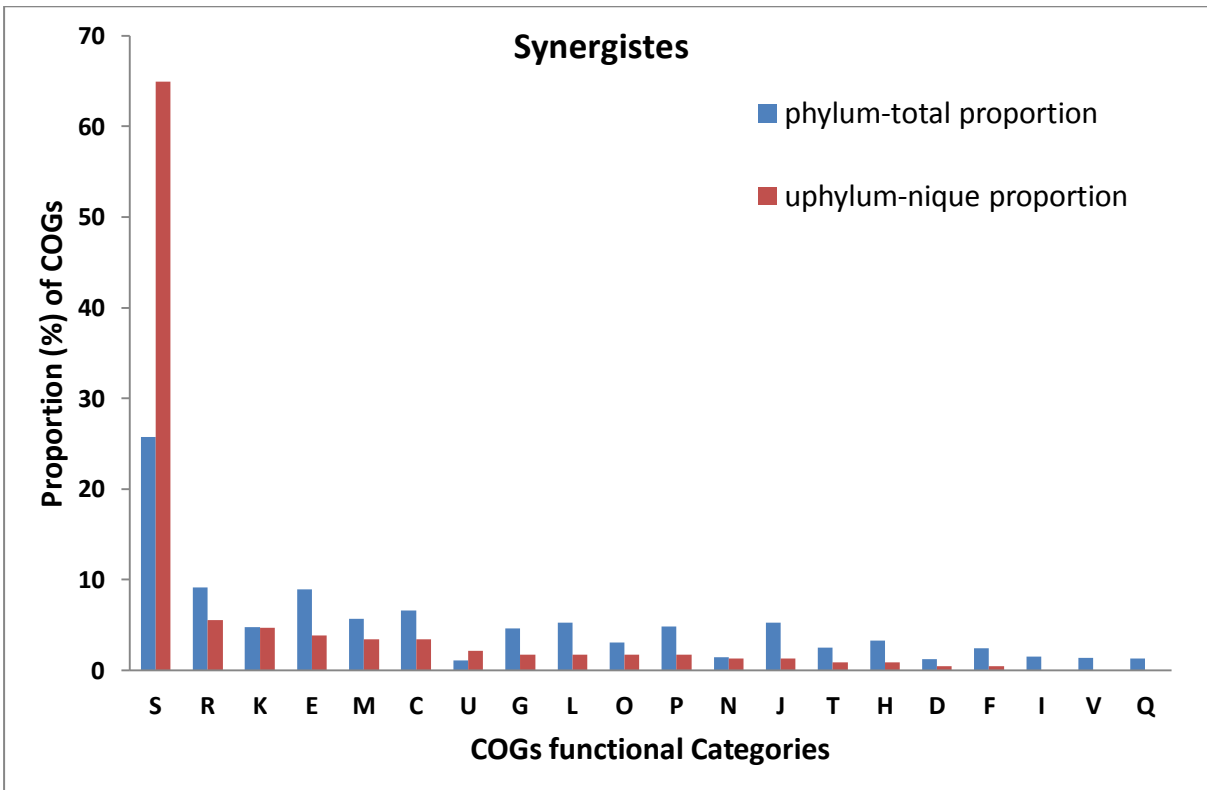

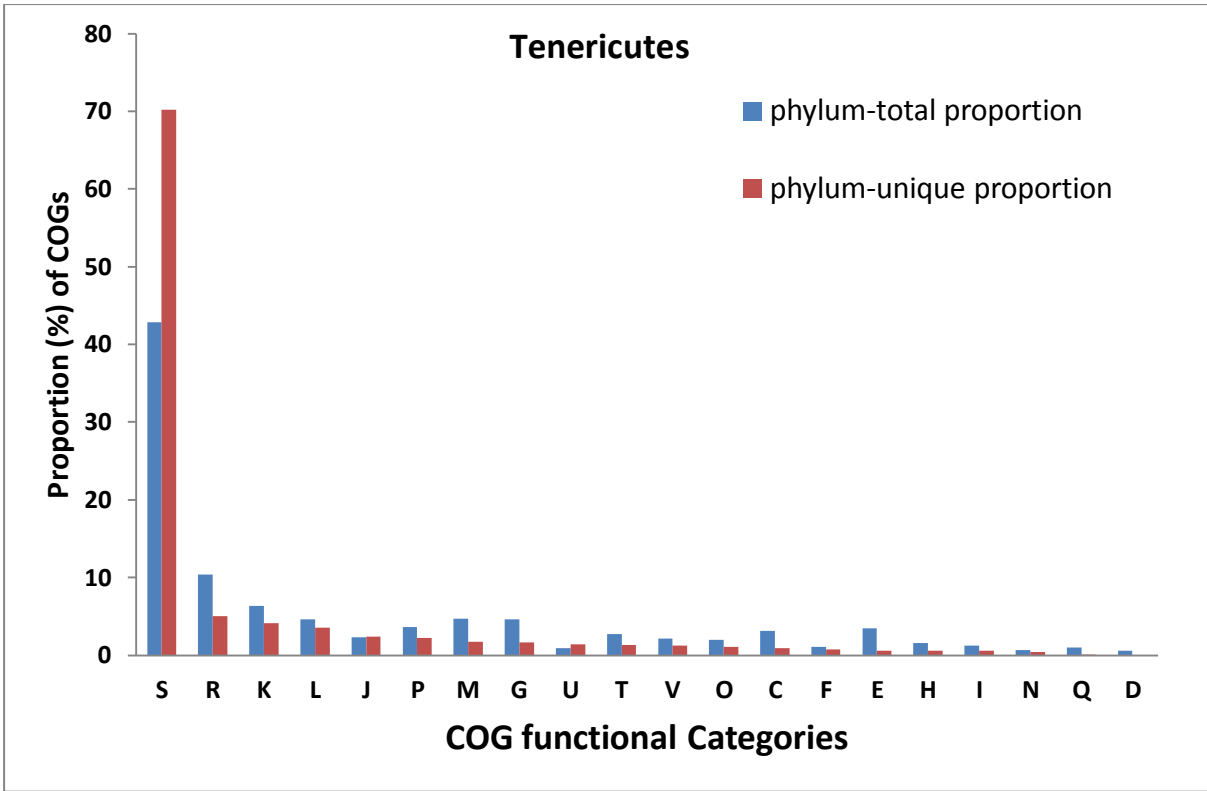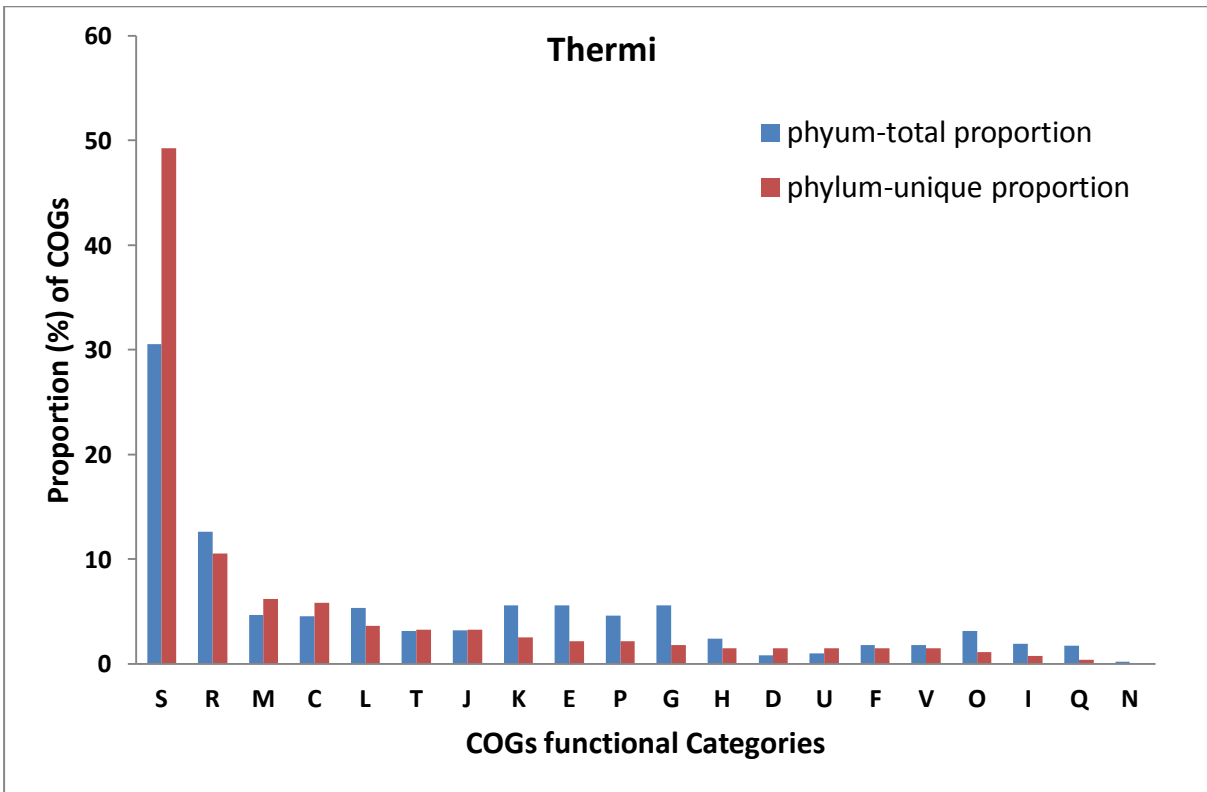

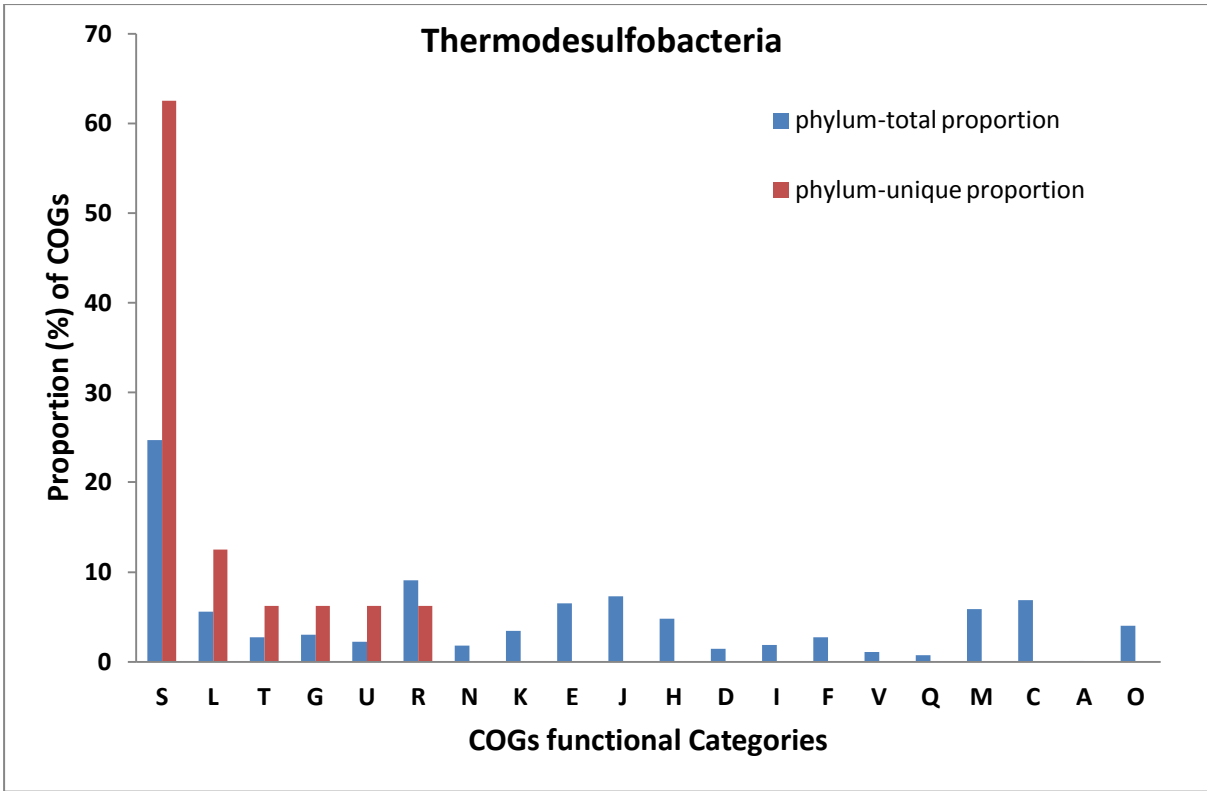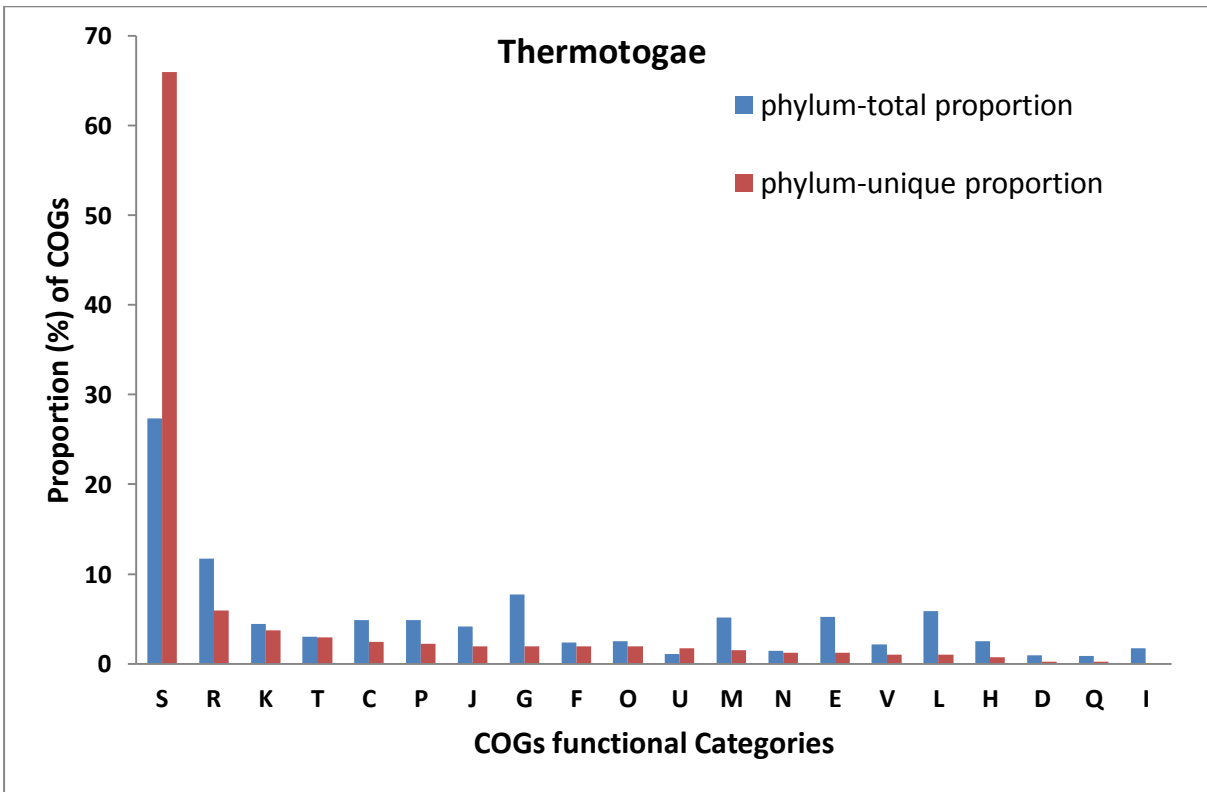

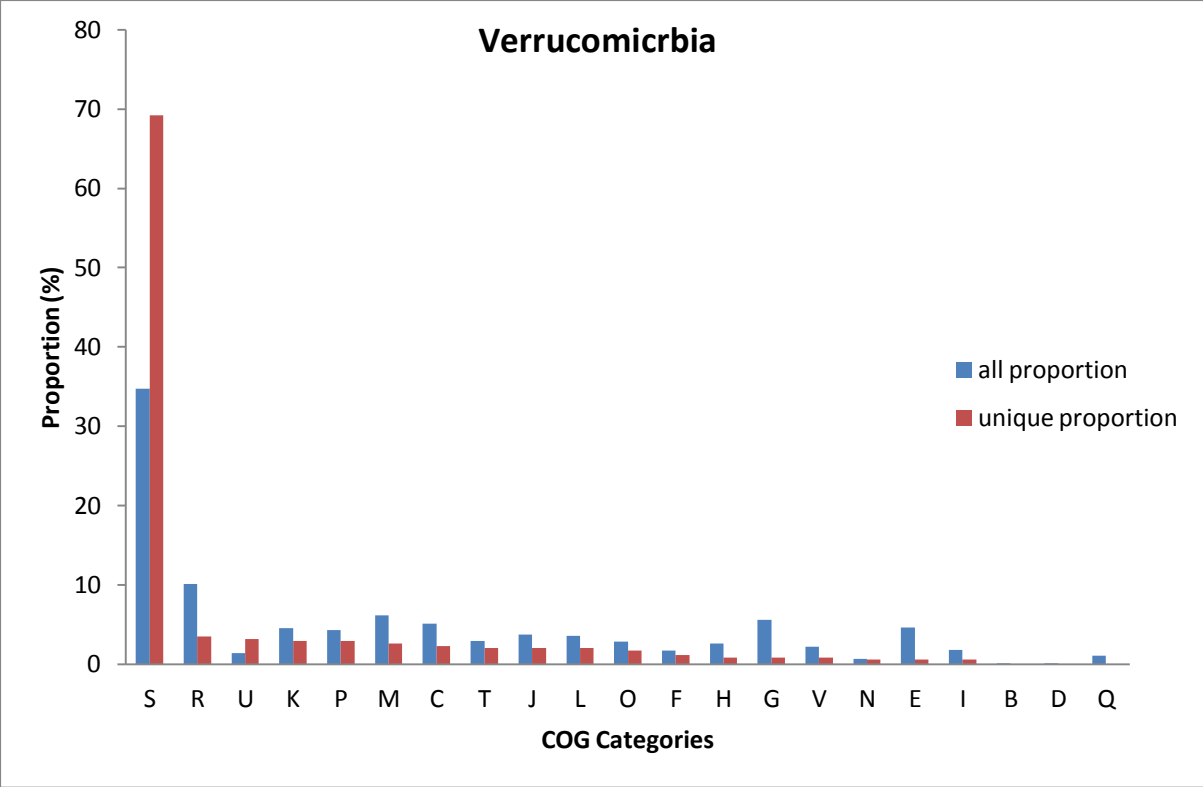

Supplement: 12864_2015_1542_MOESM6_ESM.pdf [file 12864_2015_1542_MOESM6_ESM.pdf]
